# Supplementary material for: Construction of a uniform zeolitic imidazole framework (ZIF-8) nanocrystal through a wet chemical route towards supercapacitor application
Source: Royal Society of Chemistry journal article supplement (doi:10.1039/d3ra06941a), 2024-01-01
Supplement: d3ra06941a1.pdf [file d3ra06941a1.pdf]

## Supplementary Information

### Construction of uniform Ziolitic imidazole framework (ZIF-8) nanocrystal through wet chemical route: towards the supercapacitor application

Iqra Rabani<sup>a\*</sup>, Je-Won Lee<sup>a</sup>, Taeyoon Lim<sup>a</sup>, Hai Bang Truong<sup>b,c</sup>, Sobia Nisar<sup>d</sup>, Sitara Afzal<sup>e</sup>,  
and Young-Soo Seo<sup>a\*</sup>

<sup>a</sup>Department of Nanotechnology and Advanced Materials Engineering, Sejong University,  
Seoul 05006, Republic of Korea

<sup>b</sup>Optical Materials Research Group, Science and Technology Advanced Institute, Van Lang  
University, Ho Chi Minh City, Viet Nam (truonghaibang@vlu.edu.vn)

<sup>c</sup>Faculty of Applied Technology, School of Engineering and Technology, Van Lang University,  
Ho Chi Minh City, Viet Nam

<sup>d</sup>Department of electronic engineering, Sejong University, Seoul 05006, Republic of Korea

<sup>e</sup>Mixed reality and interaction laboratory, Sejong University, Seoul 05006, Republic of Korea

\*Equivalent Corresponding author's e-mail: [iqrarabani@sejong.ac.kr](mailto:iqrarabani@sejong.ac.kr) &  
[ysseo@sejong.ac.kr](mailto:ysseo@sejong.ac.kr)

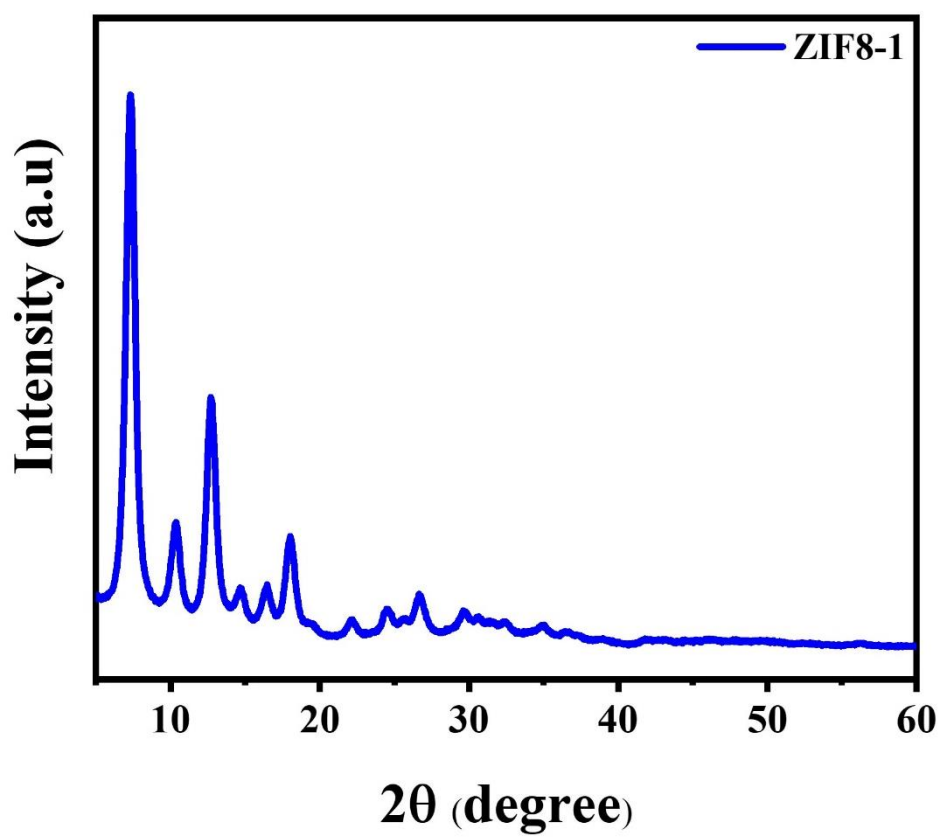

*Figure S1: XRD pattern of the ZIF8-1 nanocrystals.*

**Table S1.** Raman Band assignments for ZIF8 nanocrystals. .

| <b>Frequency (cm<sup>-1</sup>)</b> | <b>Band Assignments<sup>a</sup></b>  |
|------------------------------------|--------------------------------------|
| 273                                | <i>v Zn-N</i>                        |
| 686                                | <i>Imidazole ring puckering</i>      |
| 833                                | <i>C-H oop bend (C4-C5)</i>          |
| 1021                               | <i>C-H oop bend</i>                  |
| 1146                               | <i>v C5-N</i>                        |
| 1187                               | <i>v C-N+N-H wag</i>                 |
| 1311                               | <i>Ring expansion+N-H wag</i>        |
| 1385                               | <i>CH3 bending</i>                   |
| 1460                               | <i>C-H wag</i>                       |
| 1508                               | <i>v C4-C5</i>                       |
| 2930                               | <i>v<sub>asym</sub> C-H (methyl)</i> |
| 3131                               | <i>v C-H (ar)</i>                    |

<sup>a</sup> v: stretching, oop: out of plane, ar: aromatic, asym: asymmetric.

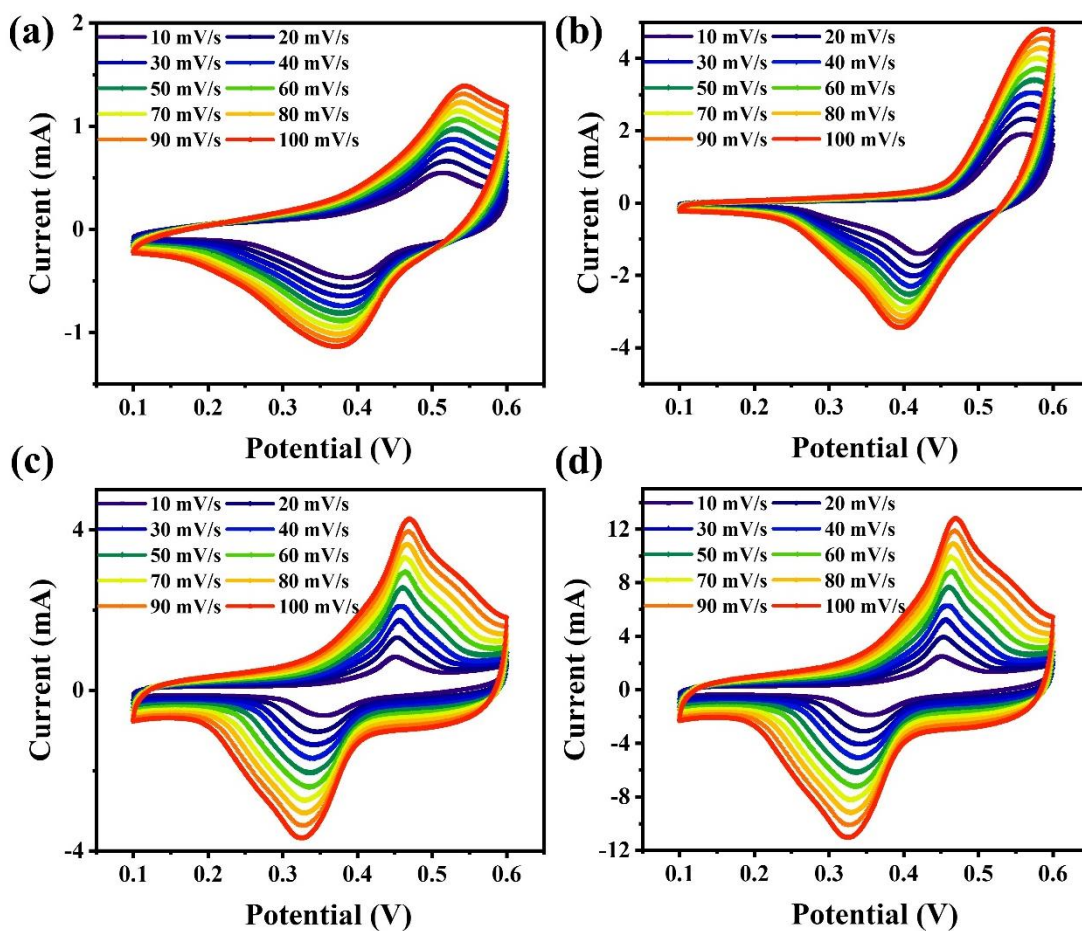

**Figure S2:** Cyclic voltametric (CV) profiles using 0.5 M  $H_2SO_4$  at various scan rates for (a) ZIF8-1 nanocrystal electrode, (b) ZIF8-2 nanocrystal electrode, (c) ZIF8-3 nanocrystal electrode and (d) ZIF8-4 nanocrystal electrode, respectively.

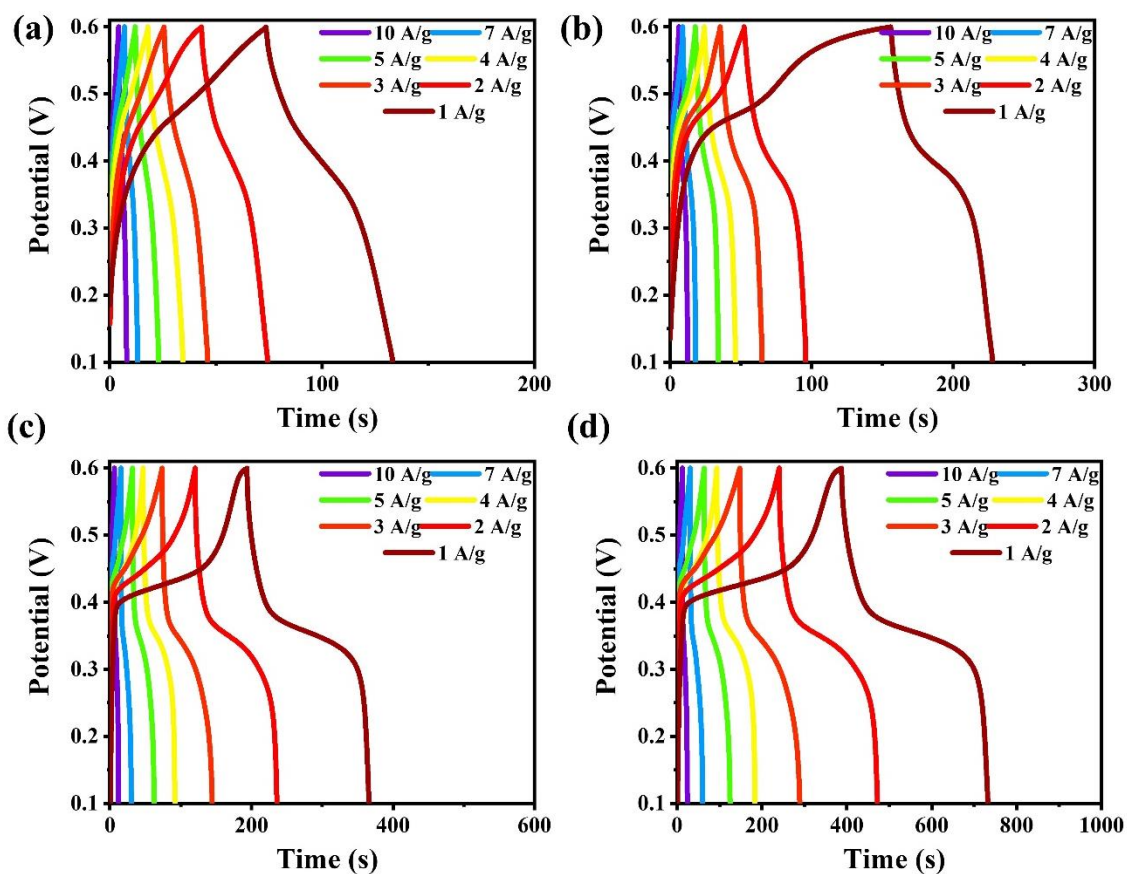

**Figure S3:** Galvanostatic charging-discharging (GCD) profiles using 0.5 M  $H_2SO_4$  at various current densities for (a) ZIF8-1nanocrystal electrode, (b) ZIF8-2 nanocrystal electrode, (c) ZIF8-3 nanocrystal electrode and (d) ZIF8-4 nanocrystal electrode, respectively.

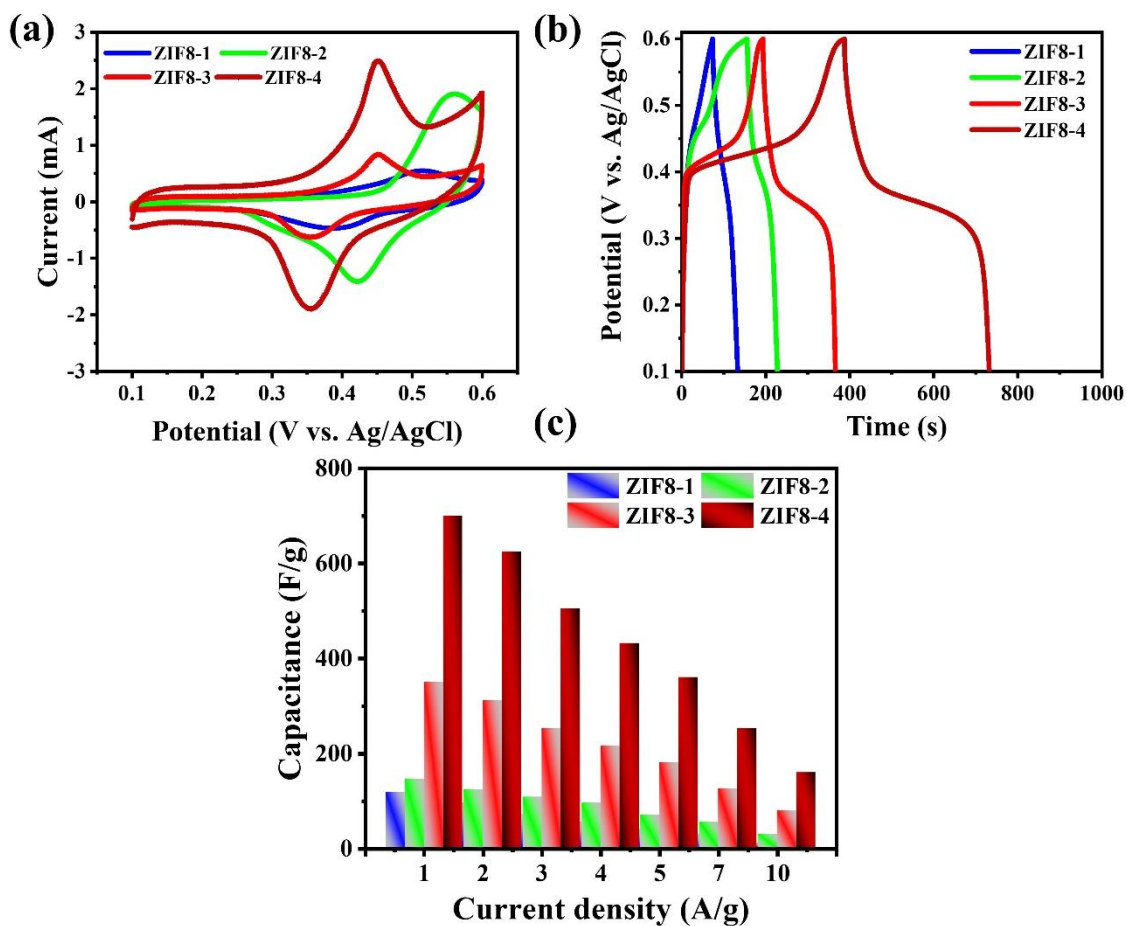

**Figure S4:** Electrochemical performance using 0.5 M  $H_2SO_4$ ; (a) comparative CV profiles for the ZIF8-1, ZIF8-2, ZIF8-3, ZIF8-4 nanocrystal electrodes at fixed scan rate of 10 mV/s, (b) comparative GCD profiles for the ZIF8-1, ZIF8-2, ZIF8-3, ZIF8-4 nanocrystal electrodes at fixed current density of 1 A/g and (c) specific capacitance against current densities.

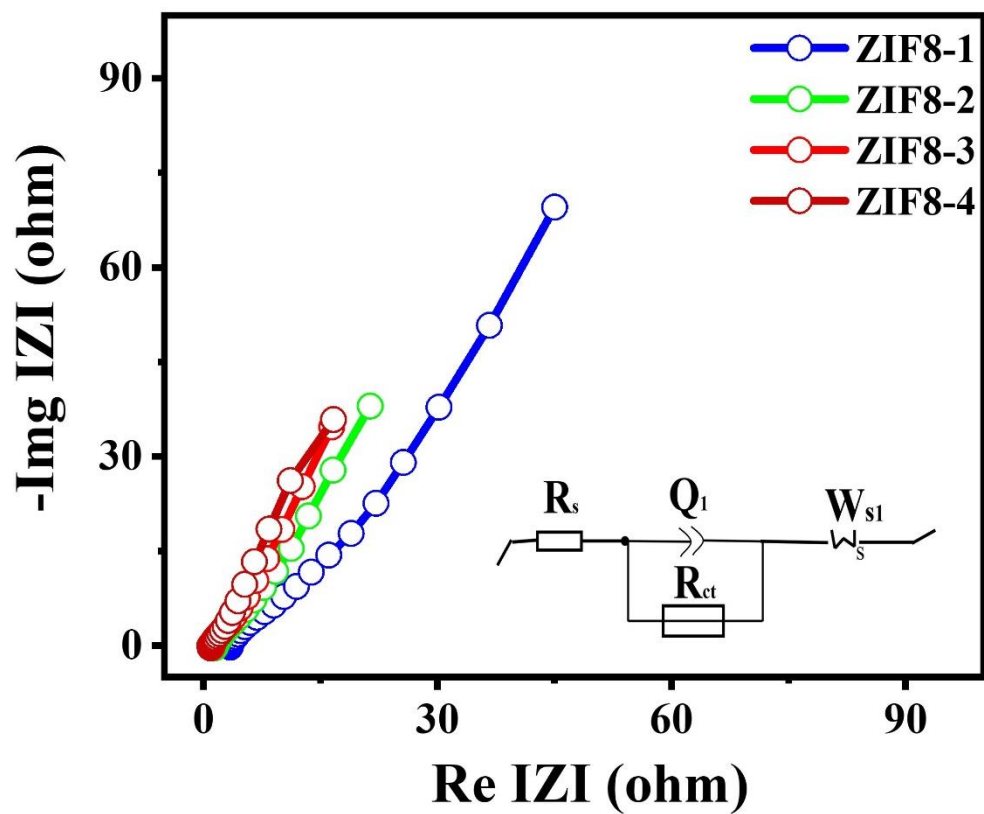

*Figure S5: Nyquist plot with equivalent fitted circuit for the ZIF8-1, ZIF8-2, ZIF8-3 and ZIF8-4 nanocrystals.*

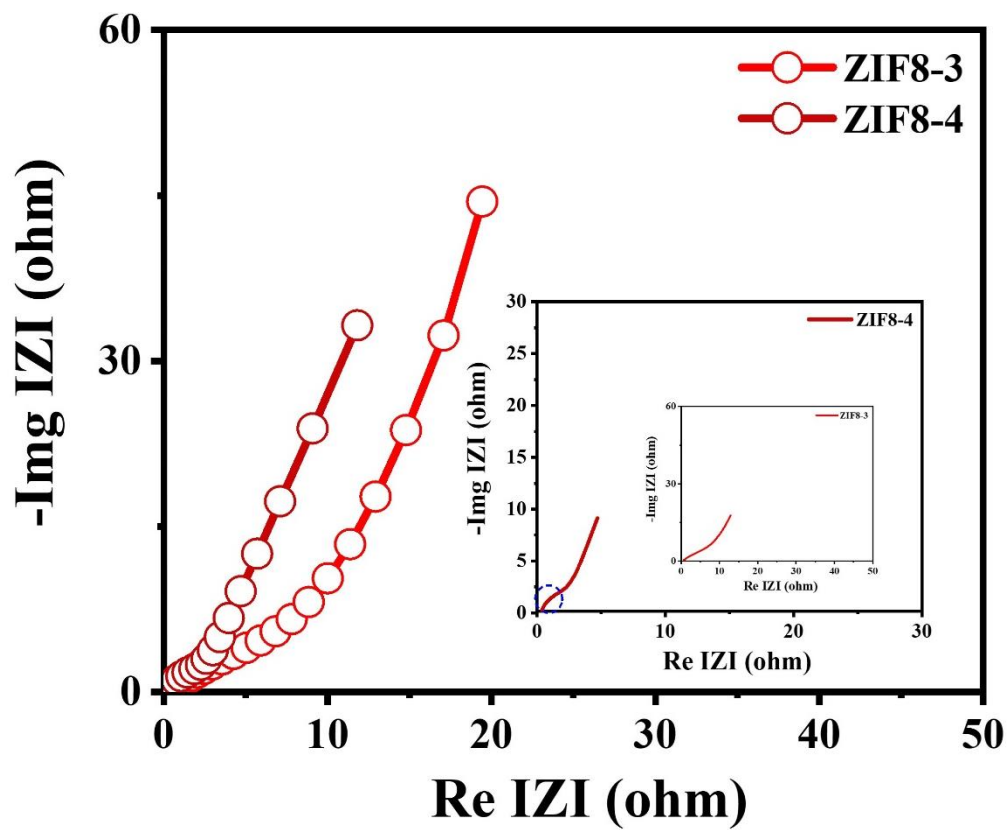

*Figure S6: Nyquist plot with equivalent fitted circuit for the ZIF8-3 and ZIF8-4 SSCs.*



**Table S2.** Comparison of electrochemical performance of the ZIF's based materials reported to date with those in the present study in three electrode measurement.

| Electrode Material          | Electrolyte                          | Specific Capacitance (F.g <sup>-1</sup> ) | Current Density (A.g <sup>-1</sup> ) | Ref              |
|-----------------------------|--------------------------------------|-------------------------------------------|--------------------------------------|------------------|
| ZIF8-4                      | 1 M KOH                              | 1420                                      | 1                                    | <b>This work</b> |
| ZIF8-3                      | 1 M KOH                              | 693                                       | 1                                    |                  |
| ZIF8-2                      | 1 M KOH                              | 545                                       | 1                                    |                  |
| ZIF8-1                      | 1 M KOH                              | 344                                       | 1                                    |                  |
| ZIF-67-PPy-2                | 1 M Na <sub>2</sub> SO <sub>4</sub>  | 554                                       | 0.5                                  | [1]              |
| ZIF-67/PPy                  | ---                                  | 1241                                      | 1                                    | [2]              |
| rGO/RuO                     | Na <sub>2</sub> SO <sub>4</sub>      | ---                                       | ---                                  | [3]              |
| RuO                         | Na <sub>2</sub> SO <sub>4</sub>      | ---                                       | ---                                  | [3]              |
| ZIF-69@Activated Carbon     | 0.5 M H <sub>2</sub> SO <sub>4</sub> | 168 F                                     | ---                                  | [4]              |
| ZIF-8@Nanoporous carbon     | 1 M H <sub>2</sub> SO <sub>4</sub>   | 251                                       | ---                                  | [5]              |
| ZIF-8@Carbon nanofiber      | 1 M H <sub>2</sub> SO <sub>4</sub>   | 322                                       | 1                                    | [6]              |
| ZIF-8/GO                    | 1 M H <sub>2</sub> SO <sub>4</sub>   | 238                                       | 1                                    | [7]              |
| ZIF-8/67                    | 0.5 M H <sub>2</sub> SO <sub>4</sub> | 286                                       | 2.5                                  | [8]              |
| ZIF-8/MWCNT                 | 1 M H <sub>2</sub> SO <sub>4</sub>   | 326                                       | 1                                    | [9]              |
| ZIF-7/glucose               | 6 M KOH                              | 228                                       | 0.1                                  | [10]             |
| ZIF-67@BIC carbon           | 1 M KOH                              | 119                                       | 0.5                                  | [11]             |
| ZIF-8@hollow carbon spheres | 6 M KOH                              | 280                                       | 1                                    | [12]             |
| ZIF-8@porous carbon         | 1 M KOH                              | 1370                                      | 1                                    | [13]             |
| rGO/RuO <sub>2</sub>        | 3 M H <sub>2</sub> SO <sub>4</sub>   | 321.5                                     | 0.5                                  | [14]             |
| RuO <sub>2</sub> /Graphene  | 1 M Na <sub>2</sub> SO <sub>4</sub>  | 441.1                                     | 0.1                                  | [15]             |
| RuO <sub>2</sub> NRs/C      | 1 M H <sub>2</sub> SO <sub>4</sub>   | 151. 1                                    | 5                                    | [16]             |
| RuO <sub>2</sub> /GC        | 2 M H <sub>2</sub> SO <sub>4</sub>   | 422.4                                     | 0.6                                  | [17]             |

|                                          |                                       |                         |                 |      |
|------------------------------------------|---------------------------------------|-------------------------|-----------------|------|
| ZnO-NiO                                  | ---                                   | 4.1                     | 5               | [18] |
| ZnO nanocones                            | ---                                   | 378.5                   | 1               | [19] |
| ZnMoO <sub>4</sub> /CoO                  | ---                                   | 4.47                    | 2               | [20] |
| ZnO/MnO <sub>2</sub> nanowires           | 1 M Na <sub>2</sub> SO <sub>4</sub>   | 501                     | 2               | [21] |
| ZnMn <sub>2</sub> O <sub>4</sub> /carbon | 6 M KOH                               | 105                     | 0.3             | [22] |
| ZnO nanocones                            | 1 M KOH                               | 236                     | 1               | [23] |
| NCA/Co <sub>3</sub> O <sub>4</sub>       | 6 M KOH                               | 616                     | 1.2             | [24] |
| ZnO/MnO <sub>2</sub>                     | 0.5 M Na <sub>2</sub> SO <sub>4</sub> | 262                     | 0.2             | [25] |
| ZnO/MnO nanoflowers                      | 1 M Na <sub>2</sub> SO <sub>4</sub>   | 556                     | 1               | [26] |
| ZnO-/core like MnO <sub>2</sub>          | 1 M Na <sub>2</sub> SO <sub>4</sub>   | 221                     | 0.5             | [27] |
| ZnO/MnO <sub>2</sub> core/shell          | 1 M Na <sub>2</sub> SO <sub>4</sub>   | 424                     | 0.5             | [28] |
| RuO <sub>2</sub>                         | ---                                   | 648                     | ---             | [29] |
| Annealed RGO-RuO <sub>2</sub>            | 1 M H <sub>2</sub> SO <sub>4</sub>    | 509.4                   | 1.20            | [30] |
| hRuO <sub>2</sub> /C                     | 1 M H <sub>2</sub> SO <sub>4</sub>    | 516.4<br>507.2<br>495.0 | 0.2<br>0.5<br>1 | [31] |
| hRuO <sub>2</sub> /CNT                   | 1 M H <sub>2</sub> SO <sub>4</sub>    | 474.7<br>444.6<br>403.7 | 0.2<br>0.5<br>1 | [31] |
| Commercial RuO <sub>2</sub> /C           | 1 M H <sub>2</sub> SO <sub>4</sub>    | 402.7<br>360.5<br>332.2 | 0.2<br>0.5<br>1 | [31] |
| Hydrous RuO <sub>2</sub> /Ketjen black   | 0.5 M H <sub>2</sub> SO <sub>4</sub>  | 647                     | ---             | [32] |
| Carbon-Ru xerogel                        | ---                                   | 256                     | 0.1             | [33] |

|                                        |                                                      |       |     |      |
|----------------------------------------|------------------------------------------------------|-------|-----|------|
| <b>RuO<sub>2</sub>/MnO<sub>2</sub></b> | ---                                                  | 438   | --- | [34] |
| <b>RuO<sub>2</sub>/TiO<sub>2</sub></b> | PVA-H <sub>3</sub> PO <sub>4</sub> -H <sub>2</sub> O | 229.9 | 0.7 | [35] |
| <b>RuOsOx/G</b>                        | 1 M H <sub>2</sub> SO <sub>4</sub>                   | 729   | 1   | [36] |

## References

- [1] X. Xu, J. Tang, H. Qian, S. Hou, Y. Bando, M.S.A. Hossain, L. Pan, Y. Yamauchi, Three-dimensional networked metal–organic frameworks with conductive polypyrrole tubes for flexible supercapacitors, *ACS applied materials & interfaces*, 9 (2017) 38737-38744.
- [2] Y. Han, C. Liu, W. Yue, A. Huang, One-pot synthesis of conductive polypyrrole incorporated ZIF-67 for high-performance supercapacitors, *Materials Letters*, 318 (2022) 132158.
- [3] V.U. Shankar, P.S. Kumar, D. Govindarajan, P. Nethaji, G.B. Balji, Ruthenium dioxide anchored on reduced graphene oxide nanocomposite for 1.2 V symmetric supercapacitor devices, *Sustainable Energy Technologies and Assessments*, 53 (2022) 102444.
- [4] Q. Wang, W. Xia, W. Guo, L. An, D. Xia, R. Zou, Functional zeolitic-imidazolate-framework-templated porous carbon materials for CO<sub>2</sub> capture and enhanced capacitors, *Chemistry–An Asian Journal*, 8 (2013) 1879-1885.
- [5] R.R. Salunkhe, Y. Kamachi, N.L. Torad, S.M. Hwang, Z. Sun, S.X. Dou, J.H. Kim, Y. Yamauchi, Fabrication of symmetric supercapacitors based on MOF-derived nanoporous carbons, *Journal of Materials Chemistry A*, 2 (2014) 19848-19854.
- [6] C. Wang, C. Liu, J. Li, X. Sun, J. Shen, W. Han, L. Wang, Electrospun metal–organic framework derived hierarchical carbon nanofibers with high

- performance for supercapacitors, *Chemical Communications*, 53 (2017) 1751-1754.
- [7] C. Li, C. Hu, Y. Zhao, L. Song, J. Zhang, R. Huang, L. Qu, Decoration of graphene network with metal–organic frameworks for enhanced electrochemical capacitive behavior, *Carbon*, 78 (2014) 231-242.
- [8] J. Kim, C. Young, J. Lee, M.-S. Park, M. Shahabuddin, Y. Yamauchi, J.H. Kim, CNTs grown on nanoporous carbon from zeolitic imidazolate frameworks for supercapacitors, *Chemical Communications*, 52 (2016) 13016-13019.
- [9] Y. Wang, B. Chen, Y. Zhang, L. Fu, Y. Zhu, L. Zhang, Y. Wu, ZIF-8@ MWCNT-derived carbon composite as electrode of high performance for supercapacitor, *Electrochimica Acta*, 213 (2016) 260-269.
- [10] P. Zhang, F. Sun, Z. Shen, D. Cao, ZIF-derived porous carbon: a promising supercapacitor electrode material, *Journal of Materials Chemistry A*, 2 (2014) 12873-12880.
- [11] X. Deng, S. Zhu, J. Li, L. Ma, F. He, E. Liu, C. He, C. Shi, Q. Li, N. Zhao, Ball-in-cage nanocomposites of metal–organic frameworks and three-dimensional carbon networks: synthesis and capacitive performance, *Nanoscale*, 9 (2017) 6478-6485.
- [12] L. Xin, R. Chen, Q. Liu, J. Liu, Z. Li, R. Li, J. Wang, Composites of hierarchical metal–organic framework derived nitrogen-doped porous carbon and

- interpenetrating 3D hollow carbon spheres from lotus pollen for high-performance supercapacitors, *New Journal of Chemistry*, 41 (2017) 12835-12842.
- [13] B. Han, G. Cheng, E. Zhang, L. Zhang, X. Wang, Three dimensional hierarchically porous ZIF-8 derived carbon/LDH core-shell composite for high performance supercapacitors, *Electrochimica Acta*, 263 (2018) 391-399.
- [14] S. Korkmaz, İ.A. Kariper, O. Karaman, C. Karaman, The production of rGO/RuO<sub>2</sub> aerogel supercapacitor and analysis of its electrochemical performances, *Ceramics International*, 47 (2021) 34514-34520.
- [15] R. Thangappan, M. Arivanandhan, R.D. Kumar, R. Jayavel, Facile synthesis of RuO<sub>2</sub> nanoparticles anchored on graphene nanosheets for high performance composite electrode for supercapacitor applications, *Journal of Physics and Chemistry of Solids*, 121 (2018) 339-349.
- [16] T.N.J.I. Edison, R. Atchudan, Y.R. Lee, Facile synthesis of carbon encapsulated RuO<sub>2</sub> nanorods for supercapacitor and electrocatalytic hydrogen evolution reaction, *International Journal of Hydrogen Energy*, 44 (2019) 2323-2329.
- [17] S. Kong, K. Cheng, T. Ouyang, Y. Gao, K. Ye, G. Wang, D. Cao, Facile electrodeposition processed of RuO<sub>2</sub>-graphene nanosheets-CNT composites as a binder-free electrode for electrochemical supercapacitors, *Electrochimica Acta*, 246 (2017) 433-442.
- [18] X. Zheng, X. Yan, Y. Sun, Z. Bai, G. Zhang, Y. Shen, Q. Liang, Y. Zhang, Au-embedded ZnO/NiO hybrid with excellent electrochemical performance as

- advanced electrode materials for supercapacitor, *ACS applied materials & interfaces*, 7 (2015) 2480-2485.
- [19] S.S. Karade, B.R. Sankapal, Two dimensional cryptomelane like growth of MoSe<sub>2</sub> over MWCNTs: symmetric all-solid-state supercapacitor, *Journal of Electroanalytical Chemistry*, 802 (2017) 131-138.
- [20] P. Li, C. Ruan, J. Xu, Y. Xie, A high-performance asymmetric supercapacitor electrode based on a three-dimensional ZnMoO<sub>4</sub>/CoO nanohybrid on nickel foam, *Nanoscale*, 11 (2019) 13639-13649.
- [21] S. Li, J. Wen, X. Mo, H. Long, H. Wang, J. Wang, G. Fang, Three-dimensional MnO<sub>2</sub> nanowire/ZnO nanorod arrays hybrid nanostructure for high-performance and flexible supercapacitor electrode, *Journal of Power Sources*, 256 (2014) 206-211.
- [22] C.-K. Sim, S.R. Majid, N.Z. Mahmood, Durable porous carbon/ZnMn<sub>2</sub>O<sub>4</sub> composite electrode material for supercapacitor, *Journal of Alloys and Compounds*, 803 (2019) 424-433.
- [23] X. He, J.E. Yoo, M.H. Lee, J. Bae, Morphology engineering of ZnO nanostructures for high performance supercapacitors: enhanced electrochemistry of ZnO nanocones compared to ZnO nanowires, *Nanotechnology*, 28 (2017) 245402.
- [24] G. Sun, L. Ma, J. Ran, X. Shen, H. Tong, Incorporation of homogeneous Co<sub>3</sub>O<sub>4</sub> into a nitrogen-doped carbon aerogel via a facile in situ synthesis method:

- implications for high performance asymmetric supercapacitors, *Journal of Materials Chemistry A*, 4 (2016) 9542-9554.
- [25] W. Li, G. He, J. Shao, Q. Liu, K. Xu, J. Hu, I.P. Parkin, Urchin-like MnO<sub>2</sub> capped ZnO nanorods as high-rate and high-stability pseudocapacitor electrodes, *Electrochimica Acta*, 186 (2015) 1-6.
- [26] E. Samuel, B. Joshi, Y.-i. Kim, A. Aldalbahi, M. Rahaman, S.S. Yoon, ZnO/MnO<sub>x</sub> nanoflowers for high-performance supercapacitor electrodes, *ACS Sustainable Chemistry & Engineering*, 8 (2020) 3697-3708.
- [27] Y. Zhao, P. Jiang, S.-S. Xie, ZnO-template-mediated synthesis of three-dimensional coral-like MnO<sub>2</sub> nanostructure for supercapacitors, *Journal of power sources*, 239 (2013) 393-398.
- [28] M. Huang, F. Li, X.L. Zhao, D. Luo, X.Q. You, Y.X. Zhang, G. Li, Hierarchical ZnO@ MnO<sub>2</sub> core-shell pillar arrays on Ni foam for binder-free supercapacitor electrodes, *Electrochimica Acta*, 152 (2015) 172-177.
- [29] R.-R. Bi, X.-L. Wu, F.-F. Cao, L.-Y. Jiang, Y.-G. Guo, L.-J. Wan, Highly dispersed RuO<sub>2</sub> nanoparticles on carbon nanotubes: facile synthesis and enhanced supercapacitance performance, *The Journal of Physical Chemistry C*, 114 (2010) 2448-2451.
- [30] F. Amir, V. Pham, J. Dickerson, Facile synthesis of ultra-small ruthenium oxide nanoparticles anchored on reduced graphene oxide nanosheets for high-performance supercapacitors, *RSC Advances*, 5 (2015) 67638-67645.



- [31] P. Wang, Y. Xu, H. Liu, Y. Chen, J. Yang, Q. Tan, Carbon/carbon nanotube-supported RuO<sub>2</sub> nanoparticles with a hollow interior as excellent electrode materials for supercapacitors, *Nano Energy*, 15 (2015) 116-124.
- [32] M. Min, K. Machida, J.H. Jang, K. Naoi, Hydrous RuO<sub>2</sub>/carbon black nanocomposites with 3D porous structure by novel incipient wetness method for supercapacitors, *Journal of the Electrochemical Society*, 153 (2005) A334.
- [33] C. Lin, J.A. Ritter, B.N. Popov, Development of Carbon-Metal Oxide Supercapacitors from Sol-Gel Derived Carbon-Ruthenium Xerogels, *Journal of the Electrochemical Society*, 146 (1999) 3155.
- [34] J. Lei, X. Chen, RuO<sub>2</sub>/MnO<sub>2</sub> composite materials for high-performance supercapacitor electrodes, *Journal of Semiconductors*, 36 (2015) 083006.
- [35] W. Yong-gang, Z. Xiao-gang, Preparation and electrochemical capacitance of RuO<sub>2</sub>/TiO<sub>2</sub> nanotubes composites, *Electrochimica Acta*, 49 (2004) 1957-1962.
- [36] M. Sarno, E. Ponticorvo, D. Scarpa, Ru and Os based new electrode for electrochemical flow supercapacitors, *Chem Eng J*, 377 (2019) 120050.
